# Supplementary material for: Disruption of the carA gene in Pseudomonas syringae results in reduced fitness and alters motility
Source: PubMed Central journal article supplement (PMC4997734; doi:10.1186/s12866-016-0819-z), 2016-08-24
Supplement: 12866_2016_819_MOESM1_ESM.pdf [file 12866_2016_819_MOESM1_ESM.pdf]

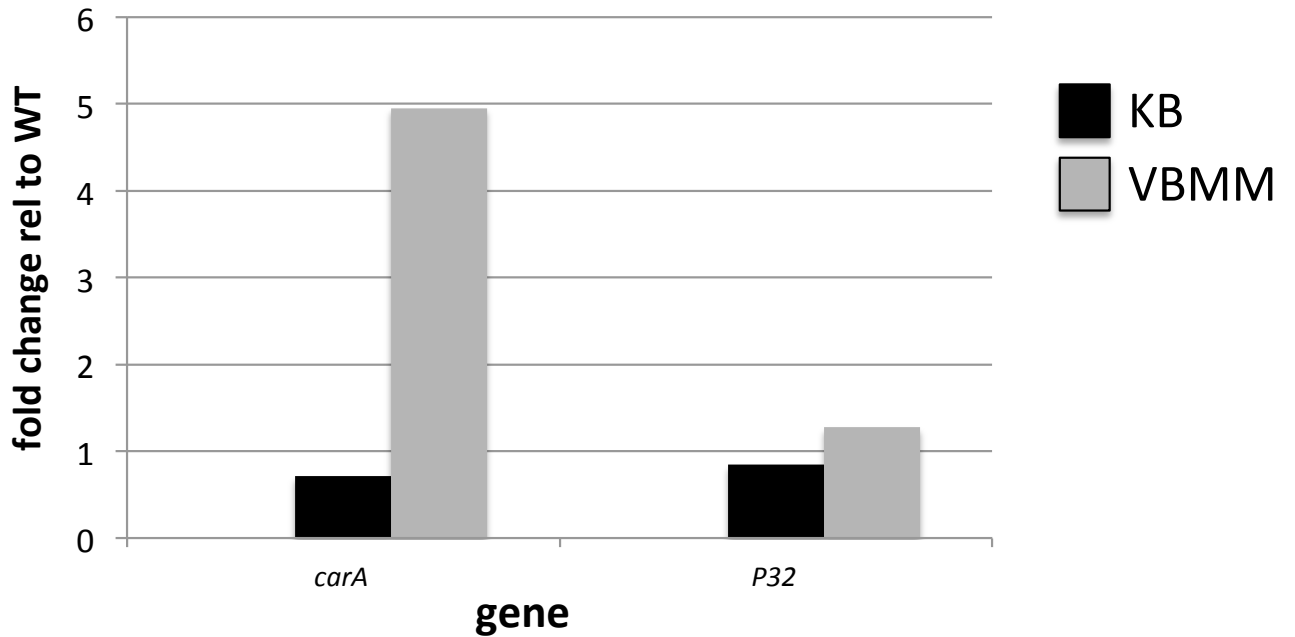

**Fig. S1. Expression of *carA* in  $\Delta P32$  mutant.** Transcript levels of *carA* and *P32* in  $\Delta P32$  mutant were compared using qRT-PCR. The black bars represent the ratios of the transcripts comparing  $\Delta P32$  mutant to the WT in KB medium and the gray bars represent the ratios of the transcripts comparing  $\Delta P32$  mutant to the WT in VBMM. RNA samples were normalized using *gap1*. Results show that the *carA* gene is expressed in a  $\Delta P32$  mutant when the cells are grown in the minimal medium VBMM.

**KB**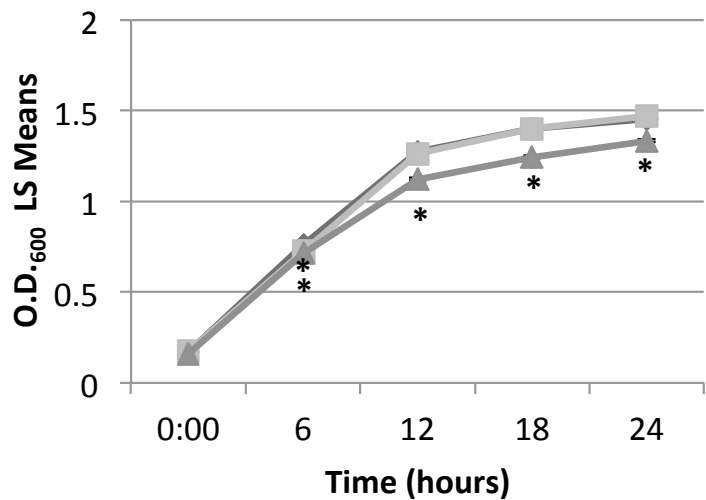**MG**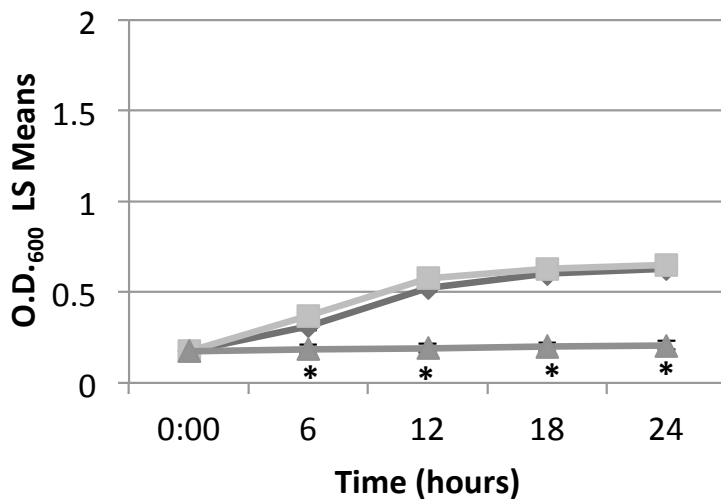**VBMM**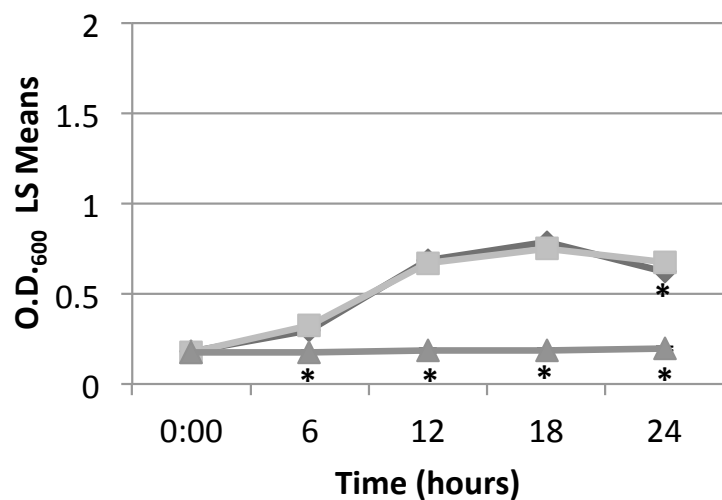**VBMM + Arginine**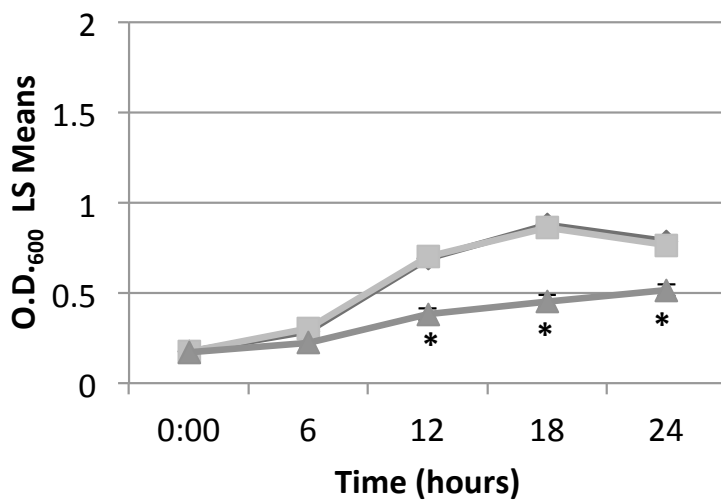**VBMM + Uracil**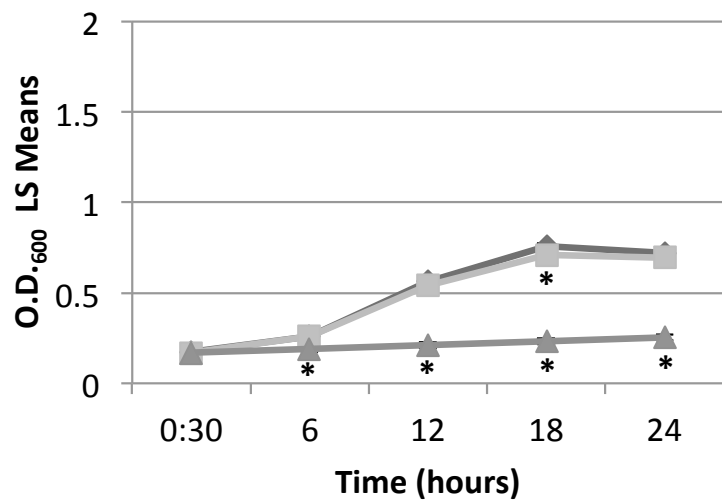**VBMM + Arginine + Uracil**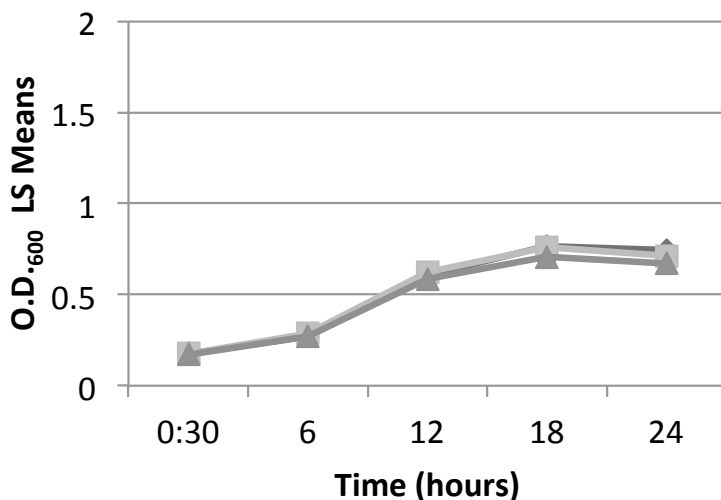

**Figure S2. Growth of the complemented mutant of  $\Delta carA$  is comparable to wild type DC3000.** Growth of wild type DC3000 (pUCP22) (dark gray diamonds),  $\Delta carA$  (pUCP22:*carA*) (light gray squares) and  $\Delta carA$  (pUCP22) (light grey triangles) in KB, MG, VBMM, VBMM supplemented with 40 mM arginine, VBMM supplemented with 10 mM uracil, and VBMM supplemented with 40 mM arginine and 10 mM uracil. Growth is represented as least squares means (LS Means) with standard error of O.D.<sub>600</sub> over time. The data shown represent 4 biological replicates per strain, each with 3 technical replicates. Post hoc comparisons were performed using Tukey HSD ( $\alpha=0.05$ ). For each time point, the values which are significantly different from wild-type are shown with an asterisk. Statistical analyses were performed using JMP Pro 11.
