# Supplementary material for: Disruption of the carA gene in Pseudomonas syringae results in reduced fitness and alters motility
Source: PubMed Central journal article supplement (PMC4997734; doi:10.1186/s12866-016-0819-z), 2016-08-24
Supplement: 12866_2016_819_MOESM2_ESM.pdf [file 12866_2016_819_MOESM2_ESM.pdf]

| Primer    | Sequence                                        |
|-----------|-------------------------------------------------|
| oSWC06433 | GCGAAGCCATTGGAGCCGA                             |
| oSWC06434 | CGATGCCAGCGATGGCAA                              |
| oSWC06435 | CGGCAGGTCACGGATGACCAGA                          |
| oSWC06439 | GCAAAAAAGCGGAATGACGTAGTTA                       |
| oBGB00034 | CAGGCTCATTGGTGGTAGACCAA                         |
| oBGB00035 | CCACTAAAAGCGCGCAGATGATT                         |
| oBGB00036 | GCAAAAAAGCGGAATGACGTAGTTA                       |
| oBGB00066 | GCTCTAGAGTCGATCGTCCCGACAGCA                     |
| oBGB00067 | CGCTTTTAGTGGACACACTAAAGCTGTA                    |
| oBGB00068 | GCTTTAGTGTGCCACTAAAAGCGGCAACCTGCGATCG<br>CCCT   |
| oBGB00069 | GCTCTAGACGTGGAACAGCGACTTGTGGATA                 |
| oBGB00070 | GGCTTAGTCAAGAAGACCTCCCGTA                       |
| oBGB00071 | GGGAGGTCTTCTTGACTAAGCCCGCTGACCGGTTGCCT<br>TGA   |
| oBGB00072 | GCTCTAGAGGACAGCTCGTCGAGGGTGTA                   |
|           |                                                 |
| oBGB00087 | GTCCATCGGCCTGGCGTG                              |
| oBGB00088 | TCGAAGAGTTCCGCACATCG                            |
| oBGB00089 | CCGCAGGTCAGTCGGCAAG                             |
| oBGB00090 | CAGCTTCGGATCAAGGCCAC                            |
| oBGB00091 | GCGTCAAGGTCAACATCC                              |
| oBGB00092 | TTGTAGGCAAGCACTTCG                              |
| oBGB00093 | GTCGCAGCGATGGCCTCT                              |
| oBGB00094 | CACCACGACATGCAGGATGTACTGGG                      |
| oBGB00095 | CAAGAAGACCTCCCGTAAATAAAGCC                      |
| oBGB00096 | TGCAAAAAAGCGGAATGACGTAG                         |
| oBGB00097 | GTTACGTCACCCCGCTTTCTTATG                        |
| oBGB00098 | GTGGACACACTAAAGCTGTAGCTTACAG                    |
| oBGB00099 | CACCACTAAAAGCGCGCAGATGATTCC                     |
| oBGB00100 | CACCCAACCTGCGATCGCCCTTT                         |
|           |                                                 |
| oBGB00112 | GCTCTAGATGGCGTGGTGACATTCCTGC                    |
| oBGB00113 | GGAACATCCAGGTCATGTCACG                          |
| oBGB00114 | CGTGACATGACCTGGATGTTCCCGAGCGCGGTTGATT<br>GTCTTG |
| oBGB00115 | GCTCTAGAGTGCTCGTCACACAGTTTGCG                   |

|         |                                  |
|---------|----------------------------------|
| SCMF3 F | GCGC-TCTAGA-TGCAACCTGCGATCGCCCTT |
| SCMF4 R | GCGC-TCTAGA-TCAGCGTCGCTTGGCCATGG |

| <b>Description</b>                                  |
|-----------------------------------------------------|
| carA forward (5' race)                              |
| carA GSP1 5' race                                   |
| carA GSP2 5' race                                   |
| P32 (upstream of carA) GSP1                         |
| upstream of P32 fwd                                 |
| P32 fwd                                             |
| P32 (upstream of carA) GSP1                         |
| ncr0186 up fwd (incl. Xbal)                         |
| ncr0186 up rev                                      |
| ncr0186 do fwd (incl. tail compl. to #67)           |
| ncr0186 do rev (incl. Xbal)                         |
| carA up rev                                         |
| carA do fwd (incl. tail compl. to #70)              |
| carA do rev (incl. Xbal)                            |
|                                                     |
| carA seq fwd                                        |
| ncr0186 and carA seq for                            |
| ncr0186 seq rev                                     |
| carA seq rev                                        |
| carA sense for RT-PCR                               |
| carA antisense for RT-PCR                           |
| crc do seq rev (outside of cloned region)           |
| carA-lux-fwd1 (WT carA for lux fusion)              |
| carA-lux-rev1 (WT for lux fusion)                   |
| carA-lux-rev2 (lacking region between P32 and carA) |
| carA-lux-rev3 (lacking half of stem loop)           |
| carA-lux-rev4 (only upstream of P32)                |
| carA-lux-fwd2 (no promoter upstream of P32)         |
| carA-lux-fwd3 (region between P32 and carA)         |
|                                                     |
| argR up for (Xbal)                                  |
| argR up rev                                         |
| argR do fwd (incl compl tail)                       |
| argR do rev (incl. Xbal)                            |

F primer to amplify the coding region of carA along with the native Shine Dalgarno sequence from DC3000; contains restriction site XbaI at the 5' end

R primer to amplify the coding region of carA from DC3000; contains restriction site XbaI at the 5' end

| Strain/plasmid         | Relevant Characteristics                                                                                     | Source                                                      |
|------------------------|--------------------------------------------------------------------------------------------------------------|-------------------------------------------------------------|
| <b>Plasmids</b>        |                                                                                                              |                                                             |
|                        |                                                                                                              |                                                             |
| pENTR/D                | Topo cloning Gateway entry vector                                                                            | Invitrogen                                                  |
| pK18mobsacB            | pMB1, <i>mob</i> , <i>sacB</i> , <i>sucrose<sup>S</sup></i> , Kan <sup>R</sup>                               | [23]                                                        |
|                        |                                                                                                              |                                                             |
| pBB67                  | pK18mobsacB- <i>Ancr0186</i> ; Kan <sup>R</sup>                                                              | This work                                                   |
| pBB68                  | pK18mobsacB- $\Delta$ <i>carA</i> ; Kan <sup>R</sup>                                                         | This work                                                   |
|                        |                                                                                                              |                                                             |
| pBB73                  | pENTR/D containing <i>carA</i> promoter region P1); Kan <sup>R</sup>                                         | This work                                                   |
| pBB74                  | pENTR/D containing <i>carA</i> promoter region P3; Kan <sup>R</sup>                                          | This work                                                   |
| pBB75                  | pENTR/D containing <i>carA</i> promoter region P4; Kan <sup>R</sup>                                          | This work                                                   |
| pBB76                  | pENTR/D containing <i>carA</i> promoter region P5; Kan <sup>R</sup>                                          | This work                                                   |
| pBB77                  | pENTR/D containing <i>carA</i> promoter region P6; Kan <sup>R</sup>                                          | This work                                                   |
| pBS208                 | <i>lux</i> reporter construct                                                                                | (Markel <i>et al.</i> , 2011; Swingle <i>et al.</i> , 2008) |
| pBB78                  | <i>lux</i> reporter construct containing <i>carA</i> promoter region P1; Kan <sup>R</sup> , Tet <sup>R</sup> | This work                                                   |
| pBB79                  | <i>lux</i> reporter construct containing <i>carA</i> promoter region P3; Kan <sup>R</sup> , Tet <sup>R</sup> | This work                                                   |
| pBB80                  | <i>lux</i> reporter construct containing <i>carA</i> promoter region P4; Kan <sup>R</sup> , Tet <sup>R</sup> | This work                                                   |
| pBB81                  | <i>lux</i> reporter construct containing <i>carA</i> promoter region P5; Kan <sup>R</sup> , Tet <sup>R</sup> | This work                                                   |
| pBB82                  | <i>lux</i> reporter construct containing <i>carA</i> promoter region P6; Kan <sup>R</sup> , Tet <sup>R</sup> | This work                                                   |
|                        |                                                                                                              |                                                             |
| pBB83                  | pK18mobsacB- <i>ΔaraR</i> ; Kan <sup>R</sup>                                                                 | This work                                                   |
| pUCP22                 | Broad host range plasmid with <i>lac</i> promoter region, Gent <sup>R</sup>                                  | (West, 1984)                                                |
| pUCP22:: <i>carA</i>   | Coding region of <i>carA</i> cloned downstream to <i>lac</i> promoter in pUCP22, Gent <sup>R</sup>           | This work                                                   |
| <b>Strains</b>         |                                                                                                              |                                                             |
|                        |                                                                                                              |                                                             |
| DC3000 (WT)            | <i>P. syringae</i> pv. <i>tomato</i> DC3000 wild-type strain DC3000, rif <sup>r</sup>                        | (Buell, 2003)                                               |
|                        |                                                                                                              |                                                             |
| <i>E. coli</i> (pBB67) | DH5 $\alpha$ containing pK18mobsacB- <i>Ancr0186</i> ; Kan <sup>R</sup>                                      | This work                                                   |
| <i>E. coli</i> (pBB68) | DH5 $\alpha$ containing pK18mobsacB- $\Delta$ <i>carA</i> ; Kan <sup>R</sup>                                 | This work                                                   |

|                        |                                      |           |
|------------------------|--------------------------------------|-----------|
| <i>E. coli</i> (pBB73) | Mach 1-TR1                           | This work |
| <i>E. coli</i> (pBB74) | Mach 1-TR1                           | This work |
| <i>E. coli</i> (pBB75) | Mach 1-TR1                           | This work |
| <i>E. coli</i> (pBB76) | Mach 1-TR1                           | This work |
| <i>E. coli</i> (pBB77) | Mach 1-TR1                           | This work |
| <i>E. coli</i> (pBB78) | Top10                                | This work |
| <i>E. coli</i> (pBB79) | pBB79                                | This work |
| <i>E. coli</i> (pBB80) | pBB80                                | This work |
| <i>E. coli</i> (pBB81) | pBB81                                | This work |
| <i>E. coli</i> (pBB82) | pBB82                                | This work |
|                        |                                      |           |
| DC3000 (pBB78)         | Wild-type strain with pBB78          | This work |
| DC3000 (pBB79)         | Wild-type strain with pBB79          | This work |
| DC3000 (pBB80)         | Wild-type strain with pBB80          | This work |
| DC3000 (pBB81)         | Wild-type strain with pBB81          | This work |
| DC3000 (pBB82)         | Wild-type strain with pBB82          | This work |
|                        |                                      |           |
| $\Delta carA$          | $\Delta carA$ deletion DC3000 mutant | This work |
| $\Delta P32$           | $\Delta P32$ deletion DC3000 mutant  | This work |
| $\Delta argR$          | $\Delta argR$ deletion DC3000 mutant | This work |
|                        |                                      |           |
|                        |                                      |           |
|                        |                                      |           |
